# Supplementary material for: Decoupled electron–phonon transport in Ag2Se thermoelectric materials through constructing TiO2/MoS2 co-decorated cell-membrane-mimic grain boundaries
Source: Royal Society of Chemistry journal article supplement (doi:10.1039/d4nr03962a), 2024-01-01
Supplement: d4nr03962a1.pdf [file d4nr03962a1.pdf]

**Decoupled electron-phonon transport in  $\text{Ag}_2\text{Se}$   
thermoelectric materials through constructing  $\text{TiO}_2/\text{MoS}_2$   
co-decorated cell-membrane-mimic grain boundaries**

Hanwen Hu<sup>a</sup>, Yiyan Liao<sup>b</sup>, Shanshan Tan<sup>b</sup>, Chen Li<sup>a</sup>, Jun Tang<sup>c</sup>, Kun Zheng<sup>a,\*</sup>, Lei Yang<sup>b,\*</sup>

<sup>a</sup>Beijing Key Laboratory of Microstructure and Properties of Solids, Beijing University of Technology, Beijing 100124, China.

<sup>b</sup>School of Materials Science & Engineering, Sichuan University, Chengdu, 610064, China.

<sup>c</sup>Key Laboratory of Radiation Physics and Technology, Ministry of Education, Institute of Nuclear Science and Technology, Sichuan University, Chengdu 610064, China.

**\* Corresponding authors**

\*E-mail: [lyang1986@scu.edu.cn](mailto:lyang1986@scu.edu.cn) (L. Yang); [kunzheng@bjut.edu.cn](mailto:kunzheng@bjut.edu.cn) (K. Zheng).

**Fig. S1.**

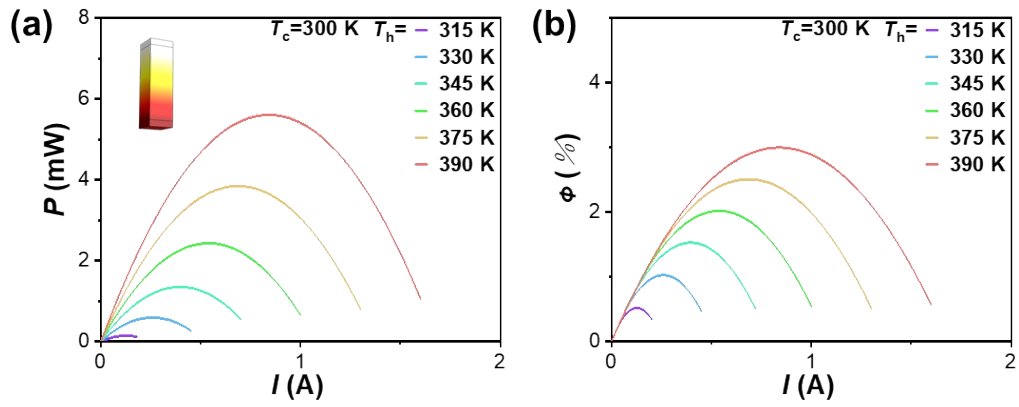

**Fig. S1.** (a-b) The results of the finite-element analysis of the  $\text{Ag}_2\text{Se}$  based module detail the output power ( $P$ ) and conversion efficiency ( $\Phi$ ) of the  $\text{Ag}_2\text{Se}$  based module as a function of current ( $I$ ) with a fixed cold side temperature ( $T_c$ ) and varied hot side temperature ( $T_h$ ).

Fig. S2.

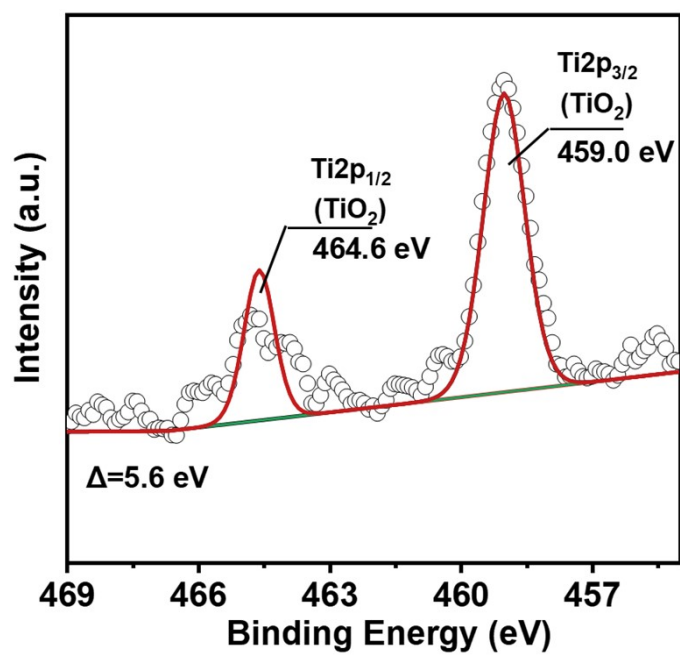

Fig. S2. High resolution XPS spectra of the AS-T-0.5 MoS<sub>2</sub> powder sample, inset is the Ti 2p spectrum.

**Fig. S3.**

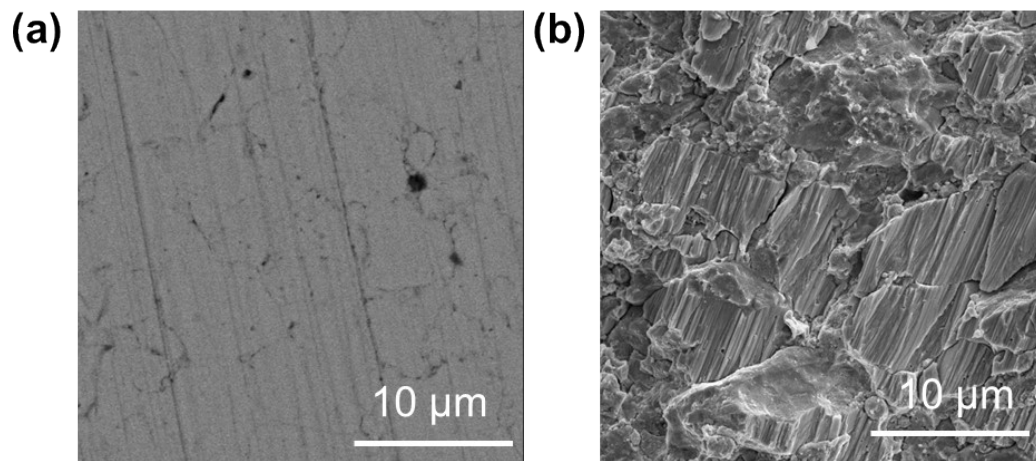

**Fig. S3.** (a) As-synthesized  $\text{Ag}_2\text{Se}$  to the as-decorated bulk samples. (b) The cross-section SEM of  $\text{Ag}_2\text{Se}$  bulk samples.

Fig. S4.

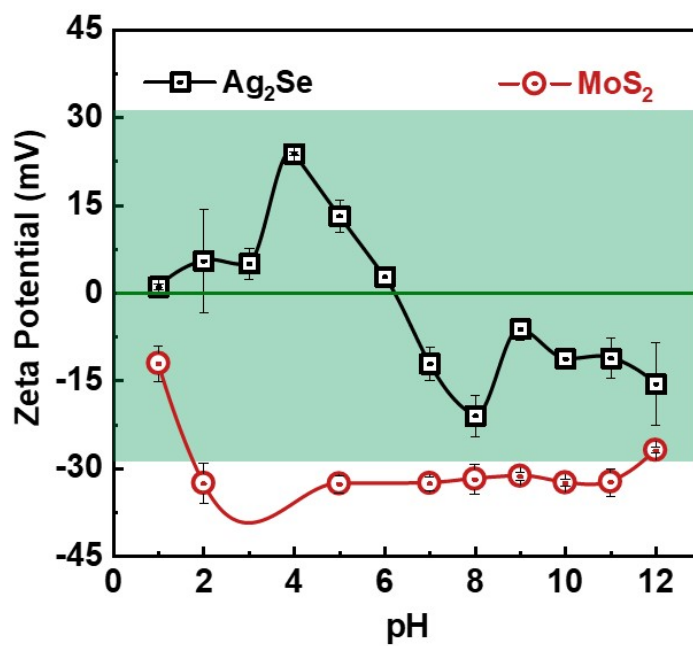

Fig. S4. Zeta potential of MoS<sub>2</sub> and Ag<sub>2</sub>Se dispersion at different pH.

**Fig. S5.**

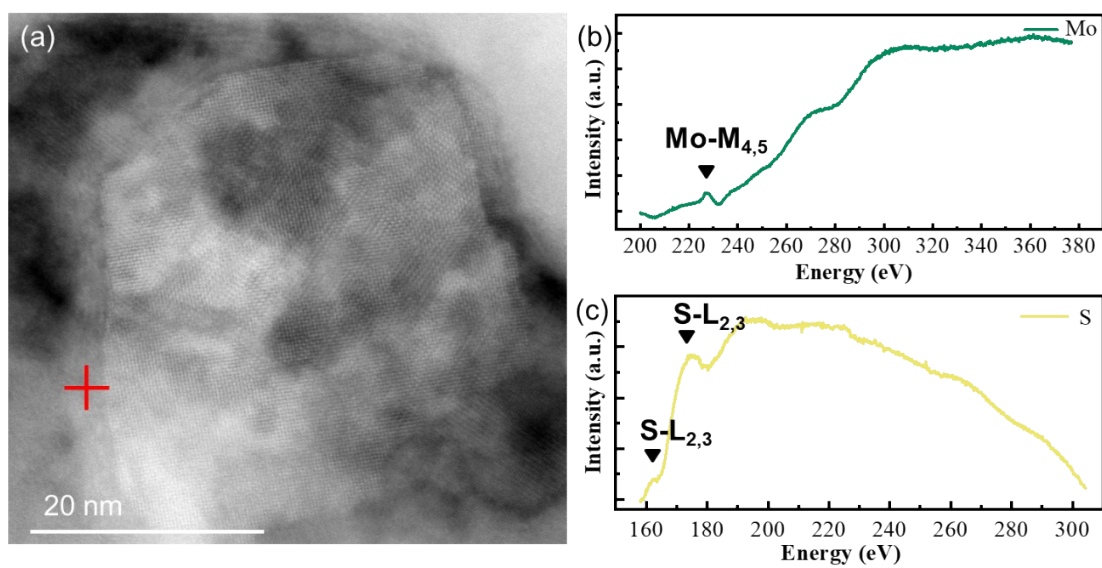

**Fig. S5.** (a) STEM-HAADF image of the TiO<sub>2</sub>/MoS<sub>2</sub> co-doped Ag<sub>2</sub>Se nanocomposites (b-c) EELS spectra of the element of Mo and S collected from a MoS<sub>2</sub> area (red cross).

Fig. S6.

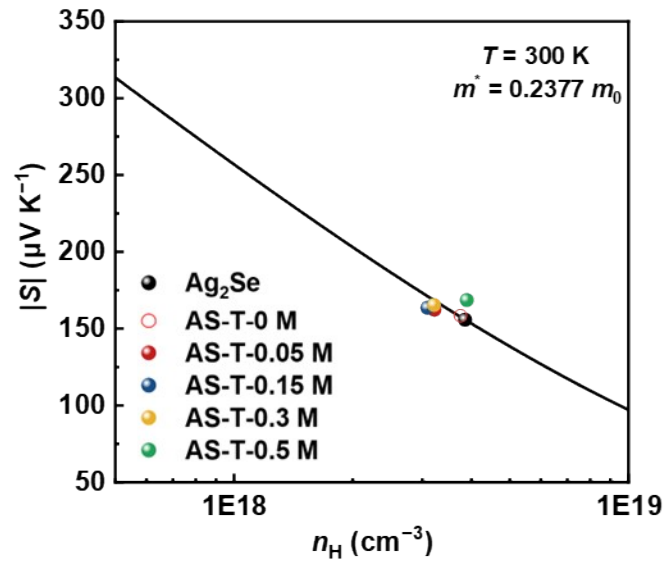

**Fig. S6.** The variation of  $S$  with  $n_H$  carrier concentration for of AS-T- $x$  M (where  $x = 0, 0.05, 0.15, 0.3$ , and  $0.5$  in wt%) compared to the Pisarenko line, which is caused by the change in the increased effective density of states mass ( $m^*$ ).

Fig. S7.

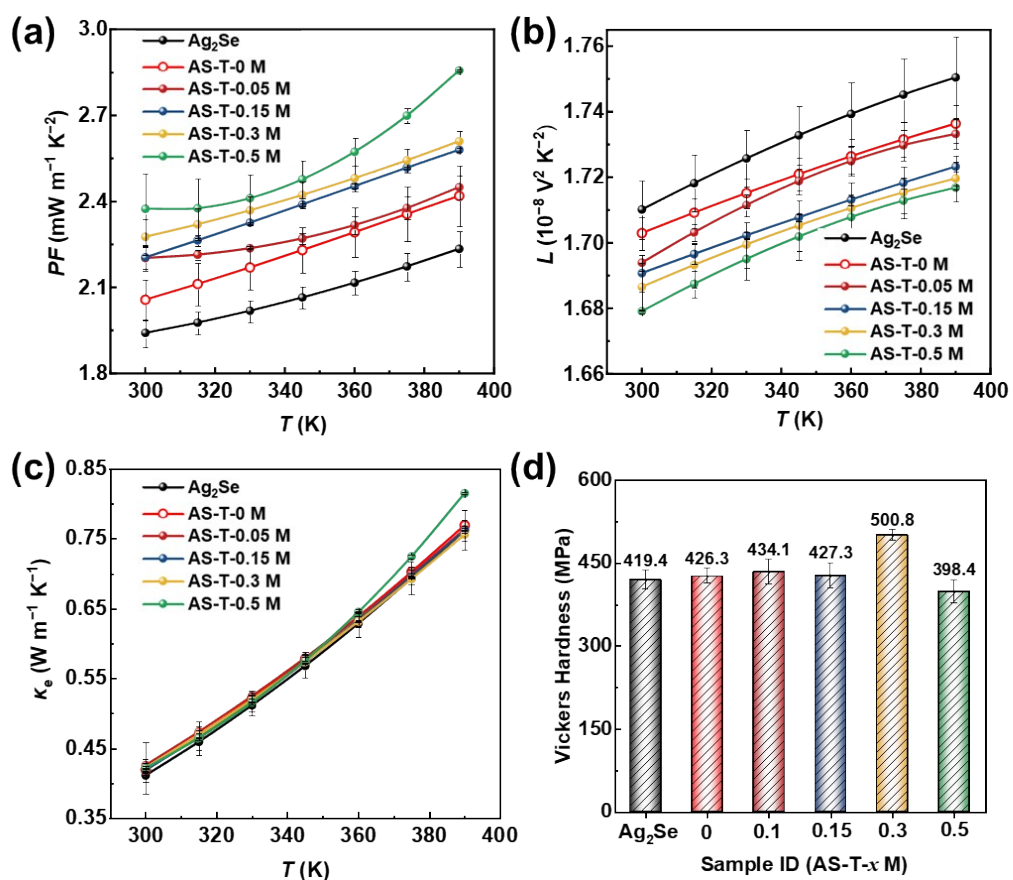

Fig. S7. Temperature-dependent (a) power factor ( $PF$ ), (b) lorentz number ( $L$ ), (c) electrons thermal conductivity ( $\kappa_e$ ) and (d) the Vickers hardness ( $H_v$ ) of  $\text{AS-T-x M}$  (where  $x = 0, 0.05, 0.15, 0.3,$  and  $0.5$  in wt%).



**Fig. S8.**

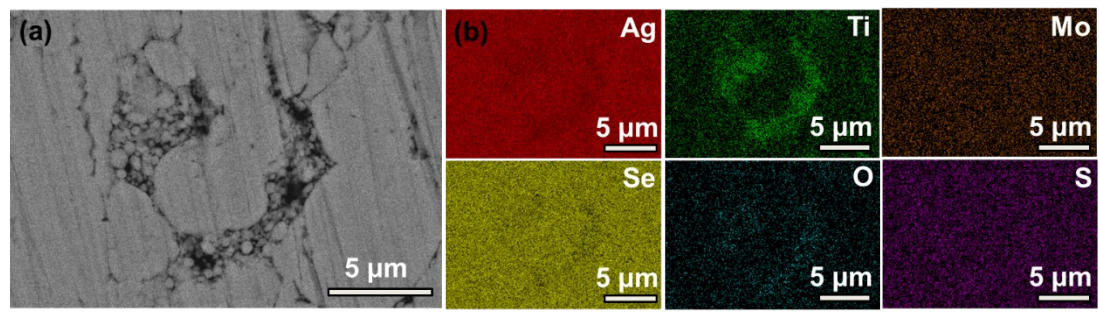

**Fig. S8.** (a) Low magnification SEM image of AS-T-0.5M sample. (b) Corresponding elemental distribution of Se, Ag, O, Ti, S, and Mo.

**Table.S1**

| PH                | 1       | 2      | 5      | 7      | 8      | 9      | 10     | 11     | 12    |
|-------------------|---------|--------|--------|--------|--------|--------|--------|--------|-------|
| Zeta              | -12.033 | -      | -      | -      | -      | -      | -      | -      | -26.9 |
| Potential<br>(mV) |         | 32.566 | 32.666 | 32.566 | 31.833 | 31.333 | 32.466 | 32.333 |       |
| Error             | -3.0666 | -      | -      | -      | 2.5333 | -      | -      | -      | 0.5   |
| range             |         | 3.4333 | 1.5333 | 1.1333 |        | 0.7666 | 0.5666 | 2.3666 |       |

**Table.S2**

| Sample             | Actual density | Relative density (%) |
|--------------------|----------------|----------------------|
| Ag <sub>2</sub> Se | 8.137          | 98.15                |
| AS-T-0.05 M        | 8.020          | 96.74                |
| AS-T-0.15 M        | 8.026          | 96.82                |
| AS-T-0.3 M         | 8.007          | 96.59                |
| AS-T-0.5 M         | 8.110          | 97.83                |
